# Supplementary material for: Theoretical formulation of Na3AO4X (A = S/Se, X = F/Cl) as high-performance solid electrolytes for all-solid-state sodium batteries
Source: Royal Society of Chemistry journal article supplement (doi:10.1039/c9ta08584j), 2019-01-01
Supplement: c9ta08584j3.pdf [file c9ta08584j3.pdf]

**Table S1** Bond lengths in  $\text{Na}_3\text{SO}_4\text{F}_{0.5}\text{Cl}_{0.5}$  and  $\text{Na}_3\text{SeO}_4\text{F}_{0.5}\text{Cl}_{0.5}$

| Bonds | Bond length (Å)                                       |                                                        |
|-------|-------------------------------------------------------|--------------------------------------------------------|
|       | $\text{Na}_3\text{SO}_4\text{F}_{0.5}\text{Cl}_{0.5}$ | $\text{Na}_3\text{SeO}_4\text{F}_{0.5}\text{Cl}_{0.5}$ |
| S-O   | 1.49408                                               | --                                                     |
| Se-O  | --                                                    | 1.66467                                                |
| Cl-Na | 2.81835                                               | 2.86087                                                |
| F-Na  | 2.23499                                               | 2.23508                                                |

**Table S2** Calculated reaction energies or experimental data (Exp), with data for stable phases taken from the Materials Project webpage: <https://www.materialsproject.org>

| Reactions                                     | Productions                                  | Calculated Energy | Exp       |
|-----------------------------------------------|----------------------------------------------|-------------------|-----------|
|                                               |                                              | (eV/atom)         | (eV/atom) |
| $\text{Na}_2\text{SO}_4+2\text{H}_2\text{O}$  | $2\text{NaOH}+\text{H}_2\text{SO}_4$         | 0.24              | -         |
| $\text{Na}_2\text{SeO}_4+2\text{H}_2\text{O}$ | $2\text{NaOH}+\text{H}_2\text{SeO}_4$        | 0.227             | -         |
| $\text{NaCl}+\text{H}_2\text{O}$              | $\text{NaOH}+\text{HCl}$                     | 0.358             | -         |
| $\text{NaF}+\text{H}_2\text{O}$               | $\text{NaOH}+\text{HF}$                      | 0.337             | -         |
| $4\text{NaCl}+\text{O}_2$                     | $2\text{Na}_2\text{O}+2\text{Cl}_2$          | 0.811             | 0.939     |
| $4\text{NaF}+\text{O}_2$                      | $2\text{Na}_2\text{O}+2\text{F}_2$           | 1.494             | 1.508     |
| $\text{Na}_2\text{S}+\text{H}_2\text{O}$      | $\text{Na}_2\text{O}+\text{H}_2\text{S}$     | 0.20              | -         |
| $\text{P}_2\text{S}_5+8\text{H}_2\text{O}$    | $2\text{H}_3\text{PO}_4+5\text{H}_2\text{S}$ | -0.014            | -         |
| $\text{Na}_2\text{S}+2\text{O}_2$             | $\text{Na}_2\text{SO}_4$                     | -1.768            | -1.515    |
| $2\text{P}_2\text{S}_5+15\text{O}_2$          | $2\text{P}_2\text{O}_5+10\text{SO}_2$        | -1.78             | -         |

**Table S3** The colours for the ions in the videos of  $\text{O}_2|\text{Na}_3\text{SeO}_4\text{F}_{0.5}\text{Cl}_{0.5}$  and  $\text{H}_2\text{O}|\text{Na}_3\text{SeO}_4\text{F}_{0.5}\text{Cl}_{0.5}$ .

| Ions   | Na     | Se     | S    | Cl    | F      | O   | H     |
|--------|--------|--------|------|-------|--------|-----|-------|
| Colour | yellow | purple | blue | green | silver | red | white |

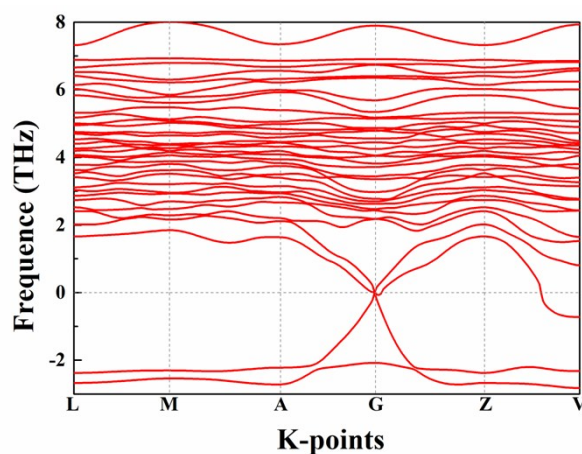

**Fig. S1** Calculated phonon band structure for  $\text{Na}_3\text{S}_{0.5}\text{Se}_{0.5}\text{O}_4\text{Cl}$ , which is dynamically unstable.

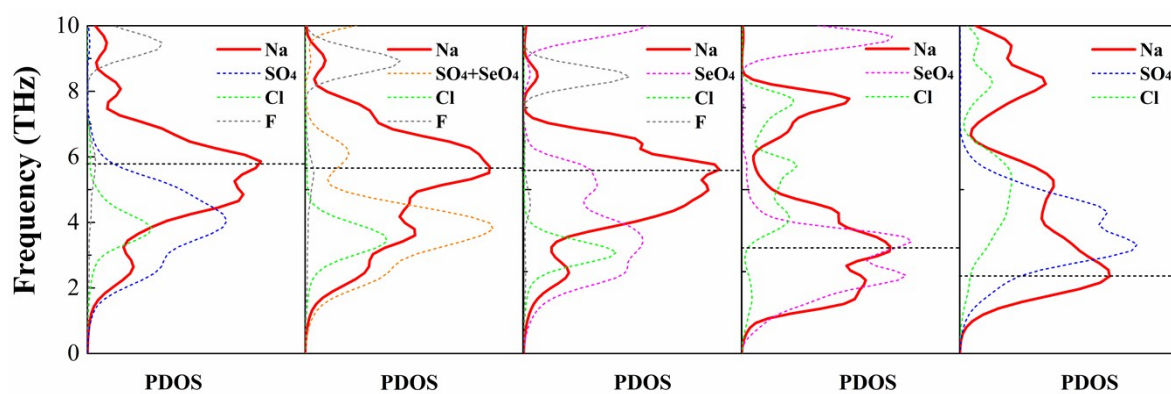

**Fig. S2** Calculated phonon PDOS for the stable structures of (a)  $\text{Na}_3\text{SO}_4\text{F}_{0.5}\text{Cl}_{0.5}$ , (b)  $\text{Na}_3\text{S}_{0.5}\text{Se}_{0.5}\text{O}_4\text{F}_{0.5}\text{Cl}_{0.5}$ , (c)  $\text{Na}_3\text{SeO}_4\text{F}_{0.5}\text{Cl}_{0.5}$ , (d)  $\text{Na}_3\text{SeO}_4\text{Cl}$  and (e)  $\text{Na}_3\text{SO}_4\text{Cl}$ .

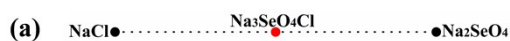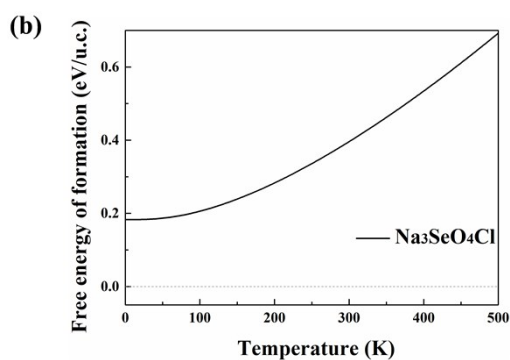

**Fig. S3** (a) Phase diagrams for  $\text{Na}_3\text{SeO}_4\text{Cl}$  at 0 K, with respect to their correspondingly stable constituents ( $\text{NaCl}$ , and  $\text{Na}_2\text{SeO}_4$ ); (b) Free energy of formation per unit cell (u.c.) for  $\text{Na}_3\text{SeO}_4\text{Cl}$ .

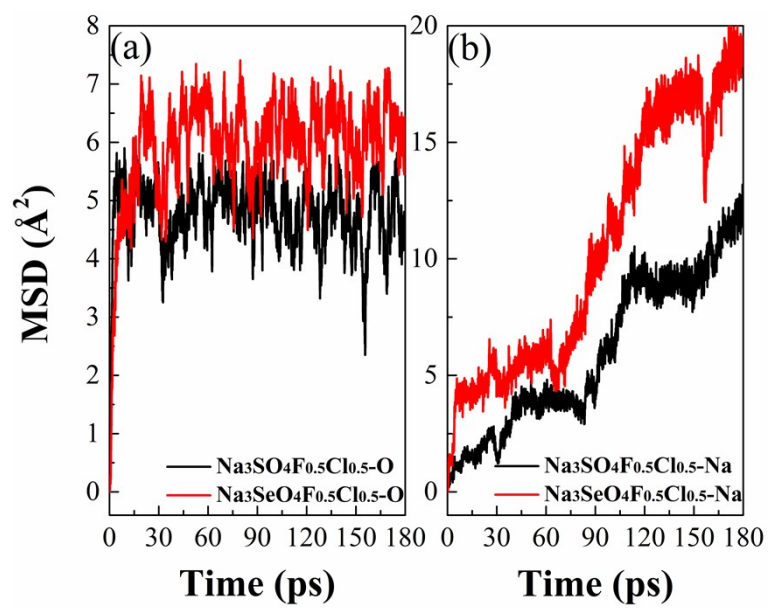

**Fig. S4** MSD of (a)  $\text{O}^{2-}$  and (b)  $\text{Na}^+$  in  $\text{Na}_3\text{SeO}_4\text{F}_{0.5}\text{Cl}_{0.5}$  (in red) and  $\text{Na}_3\text{SO}_4\text{F}_{0.5}\text{Cl}_{0.5}$  (in black) carried out at 1000 K.

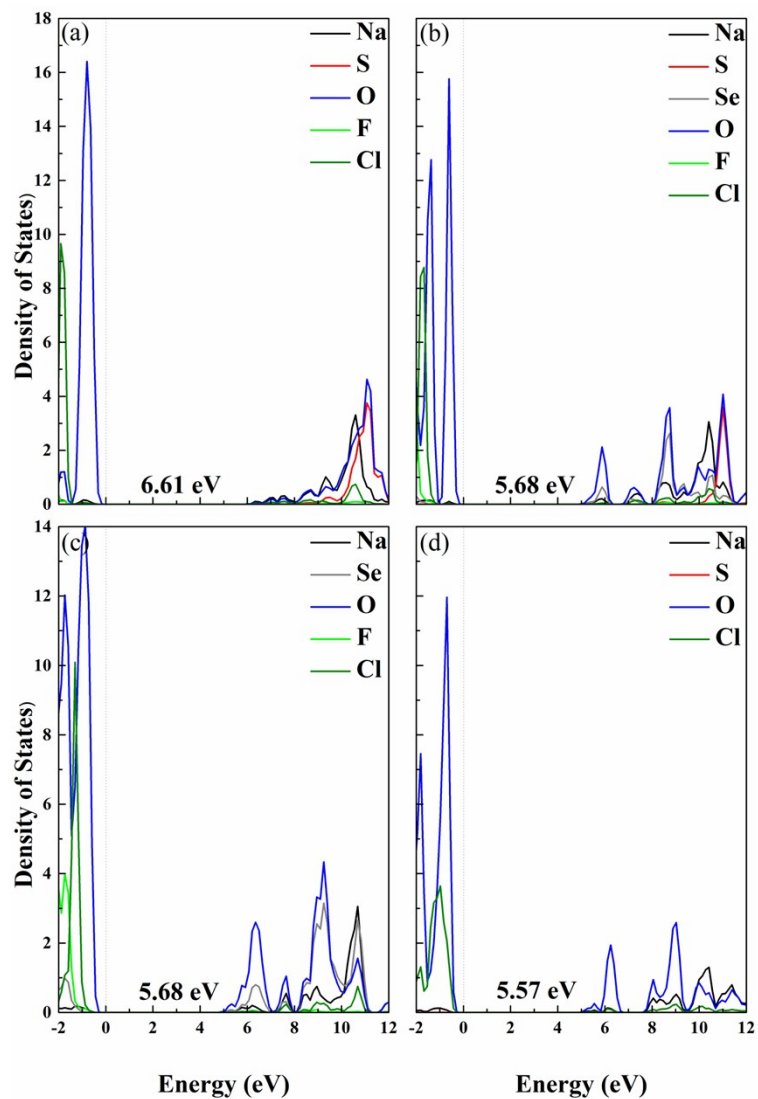

**Fig. S5** The projected density of states calculated using the HSE06 functional: (a)  $\text{Na}_3\text{SO}_4\text{F}_{0.5}\text{Cl}_{0.5}$ , (b)  $\text{Na}_3\text{S}_{0.5}\text{Se}_{0.5}\text{O}_4\text{F}_{0.5}\text{Cl}_{0.5}$ , (c)  $\text{Na}_3\text{SeO}_4\text{F}_{0.5}\text{Cl}_{0.5}$  and (d)  $\text{Na}_3\text{SO}_4\text{Cl}$ .
